# Supplementary material
Source: PubMed Central journal article supplement (PMC3488049)
Supplement: supp_M112.389015_jbc.M112.389015-1.pdf [file supp_M112.389015_jbc.M112.389015-1.pdf]

## **SUPPLEMENTAL TABLE 1. Quantitative qRT-PCR primer list.**

**SUPPLEMENTAL FIGURE 1. eHsp90 mediated migration requires LRP1.** *A*, Representative results of a scratch wounding assay with PC3 following treatment with NPGA (1  $\mu$ M) or either of two different eHsp90 antibodies (SPA-830, Ab1; SPS-771, Ab2). *B*, Immunoblot validation of LRP1 shRNA knockdown in DU145 cells. Representative images of cell motility from a wounding assay with scrambled (scr) shRNA or shLRP1 in DU145 prostate cancer cells. Magnification is 100x. Asterisks (\*) indicate significance  $p \leq 0.05$ .

**SUPPLEMENTAL FIGURE 2. eHsp90 promotes LRP1 mediated motility and ERK phosphorylation.** *A*, Immunoblot analysis of LRP1 and indicated EMT effectors in ARCaPE/ARCaPM and M12/P69 cell pairs. *B*, *C*, Wounding assay in ARCaPE/P69 following a 3 day pretreatment with eHsp90 protein, and in ARCaPM/M12 with NPGA treatment for 20 h. *D*, Immunoblot validation of LRP1 expression in ARCaPE shLRP1 cells, and wounding assay to evaluate the effects upon eHsp90 directed cell motility. Magnification is 100x. *E*, Time dependent analysis of MEK/ERK activation from ARCaPE cells treated with 3  $\mu$ g/ml eHsp90.

**SUPPLEMENTAL FIGURE 3. eHsp90 regulates the localization of junctional proteins and cell morphology.** *A*, Confocal microscopy was utilized to evaluate E-cadherin and ZO-1 cellular localization in P69 control (lac Z transduced) and P69-eHsp90 modified cells. *B*, Evaluation of the effects of eHsp90 inhibition (5 day NPGA treatment) upon E-cadherin and ZO1 membrane localization in ARCaPM and M12 prostate mesenchymal cell lines. Scale bar is 50  $\mu$ m.

**SUPPLEMENTAL FIGURE 4. Proteolytic activity and ERK signaling is required for eHsp90 mediated cell migration.** Wounding assay using ARCaPE-eHsp90 prostate cancer cells pretreated with NPGA (1  $\mu$ M), GM6001 (1  $\mu$ M), MMP2/9 inhibitor (SB-3CT, 1  $\mu$ M) MMP3 inhibitor (inhibitor IV, 5  $\mu$ M) and ERK inhibitor (UO126, 10 $\mu$ M) for three days. Magnification is 100x.

| <u>Name</u> | <u>Accession#</u> |           | <u>Sequence</u>            |
|-------------|-------------------|-----------|----------------------------|
| CDH1        | NM_004360         | Sense     | TGGGCCAGGAAATCACATCCTACA   |
|             |                   | Antisense | TTGGCAGTGTCTCTCCAAATCCGA   |
| SNAI1       | NM_005985         | Sense     | TTTCTGGTTCTGTGTCCTCTGCCT   |
|             |                   | Antisense | TTCCCAGTGAGTCTGTGTCAGCCTTT |
| SNAI2       | NM_003068         | Sense     | TTTCTGGGCTGGCCAAACATAAGC   |
|             |                   | Antisense | ACACAAGGTAATGTGTGGGTCCGA   |
| ZEB1        | NM_030751         | Sense     | ATGCACAACCAAGTGCAGAAGAGC   |
|             |                   | Antisense | TTGCCTGGTTCAGGAGAAGATGGT   |
| ZEB2        | NM_014795         | Sense     | ATATGGTGACACACAAGCCAGGGA   |
|             |                   | Antisense | GTTTCTTGCAGTTTGGGCACTCGT   |
| MMP2        | NM_004530         | Sense     | AGAAGGATGGCAAGTACGGCTTCT   |
|             |                   | Antisense | AGTGGTGCAGCTGTGCATAGGATGT  |
| MMP3        | NM_002422         | Sense     | AGGTGTGGAGTTCCTGATGTTGGT   |
|             |                   | Antisense | TACAGCCTGGAGAATGTGAGTGGA   |
| MMP9        | NM_004994         | Sense     | ATTTCTGCCAGGACCGCTTCTACT   |
|             |                   | Antisense | CAGTTTGTATCCGGCAAACCTGGCT  |
| GAPDH       | NM_002046         | Sense     | TCGACAGTCAGCCGCATCTTCTTT   |
|             |                   | Antisense | ACCAAATCCGTTGACTCCGACCTT   |

**Table S1**

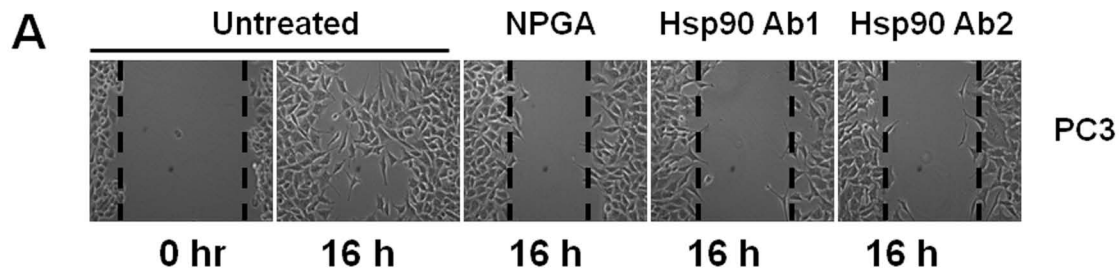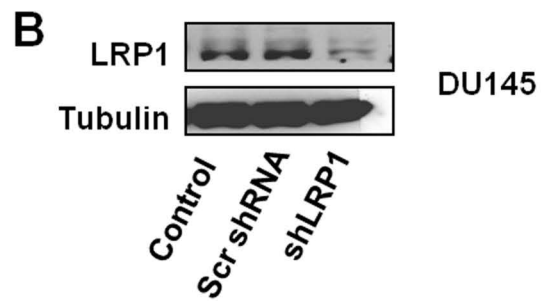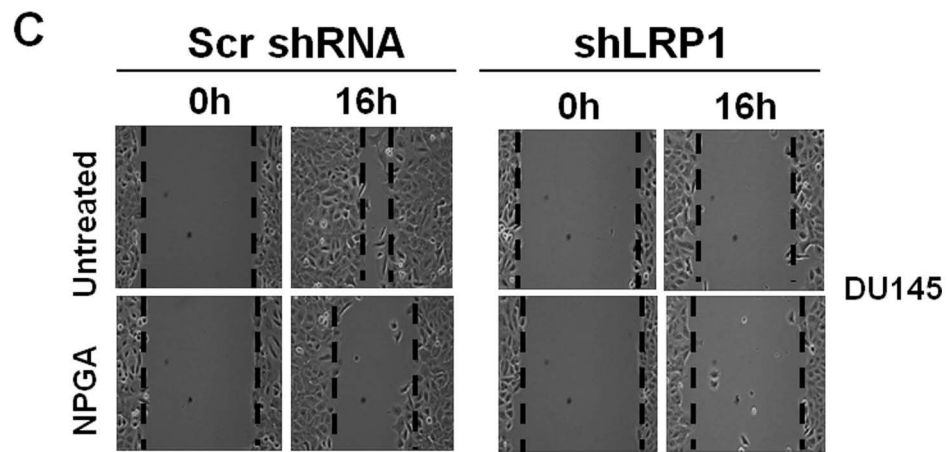

**Fig. S1**

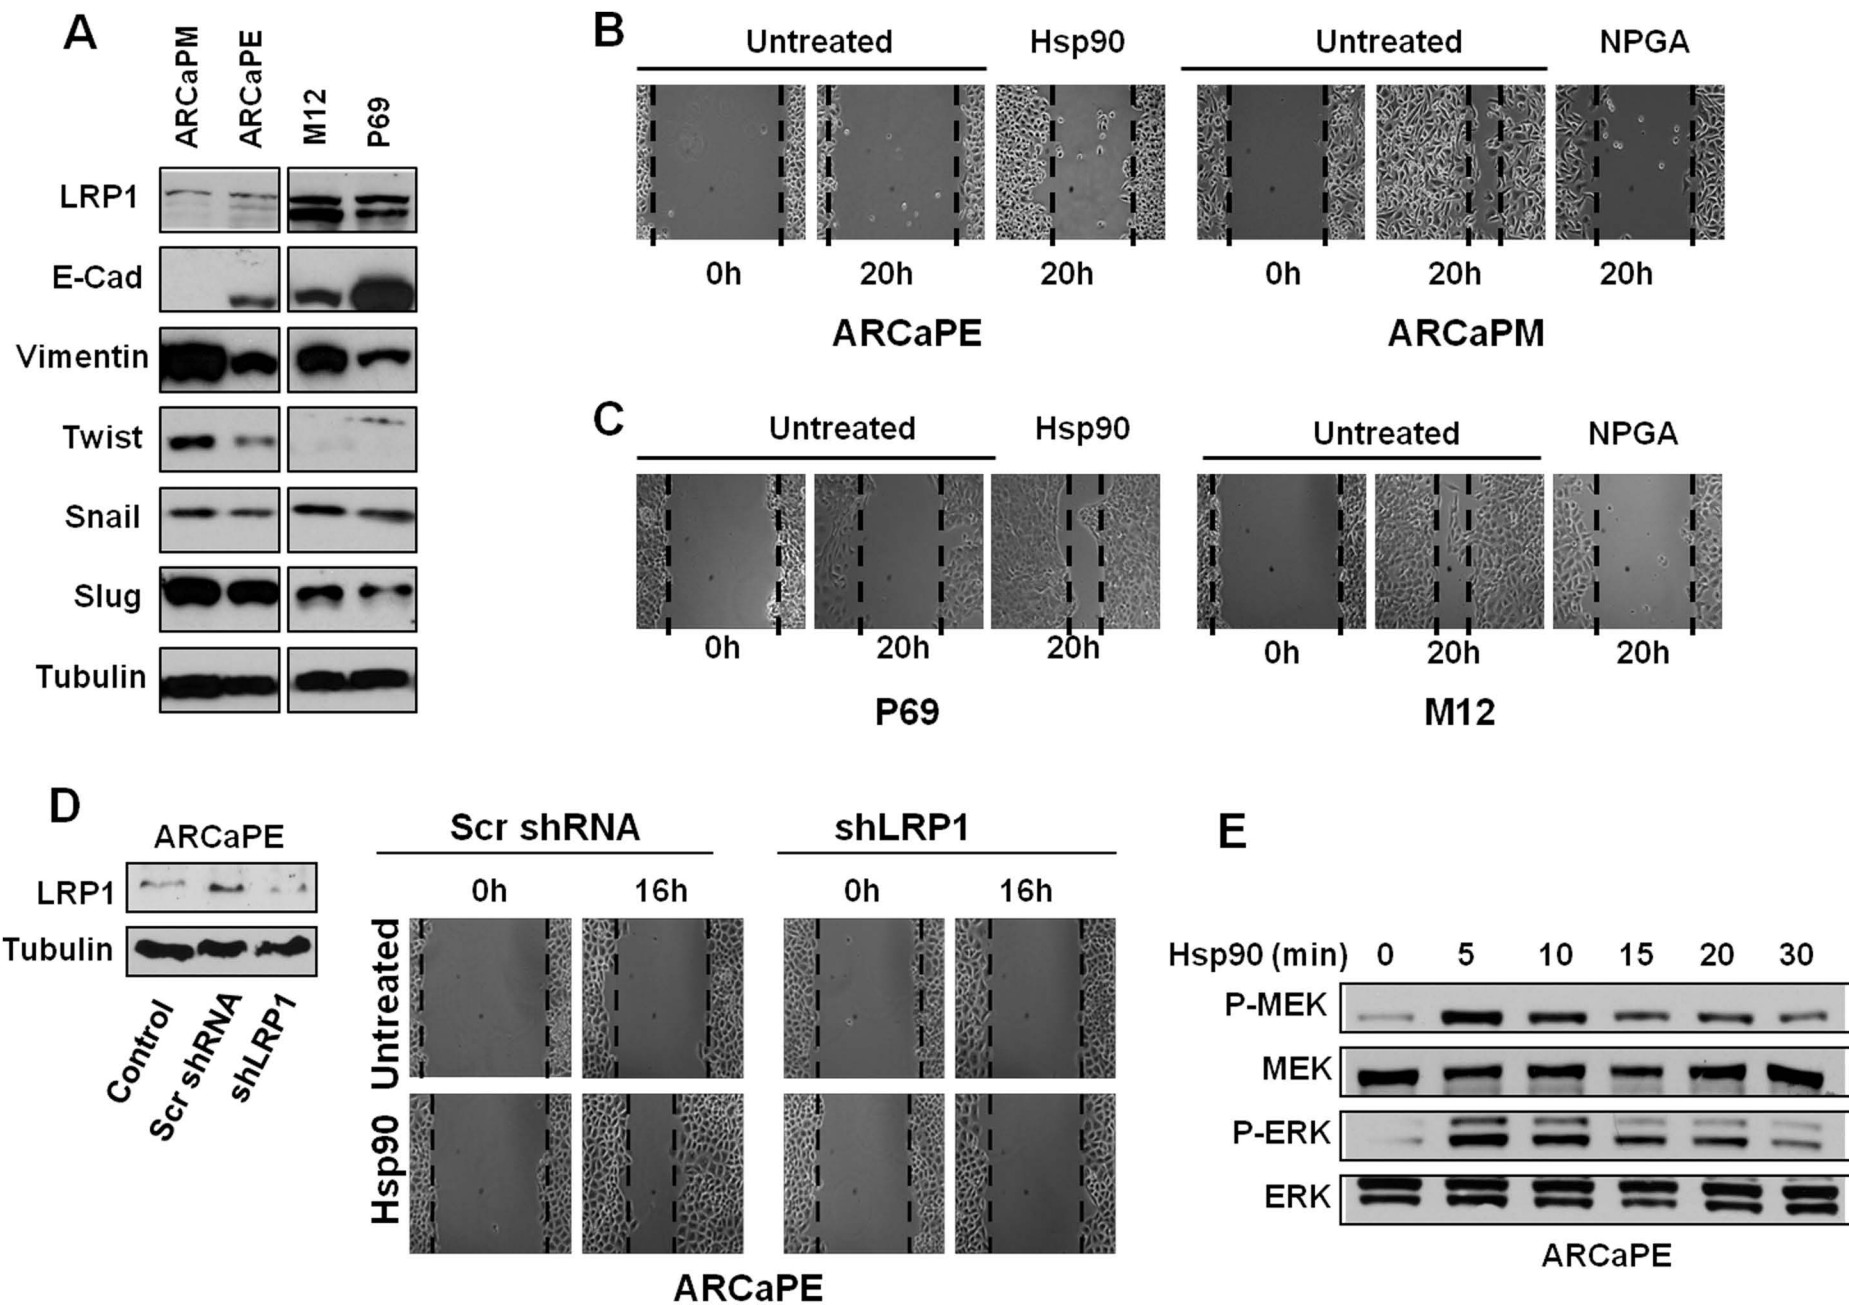

Fig. S2

**A****P69 LacZ****P69-eHsp90**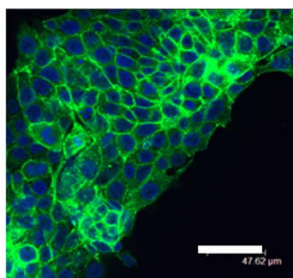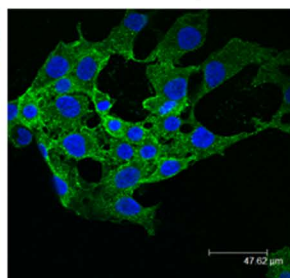**E-cad/Topro**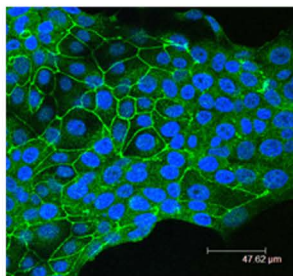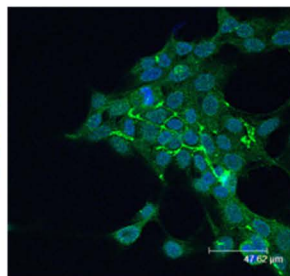**ZO1/Topro****B****Untreated****5d NPGA****Untreated****5d NPGA**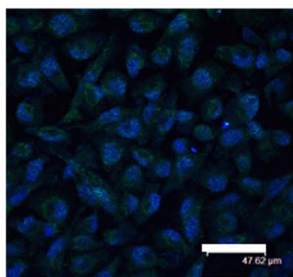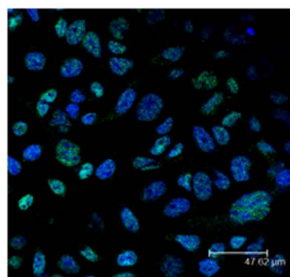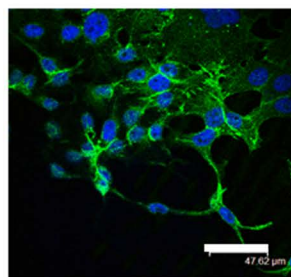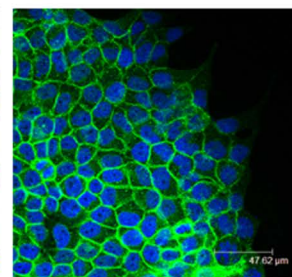**E-cad/Topro**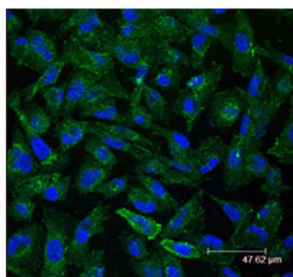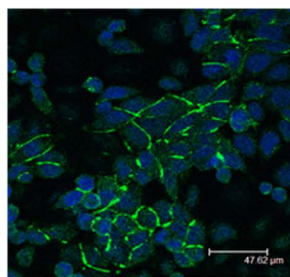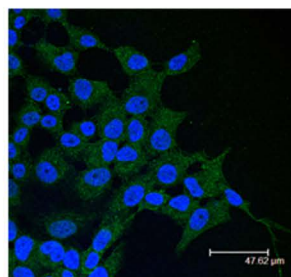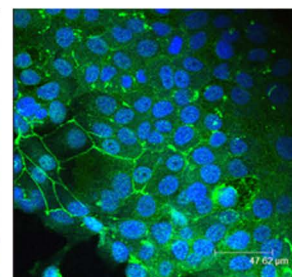**ZO1/Topro****ARCaPM****M12****Fig. S3**

## ARCaPE-LacZ

Untreated

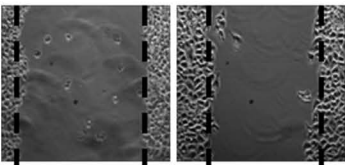

0h

20h

## ARCaPE-eHsp90

Untreated

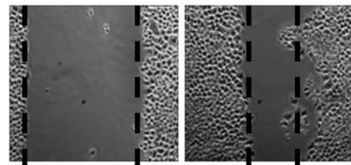

0h

20h

NPGA

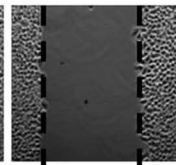

20h

GM6001

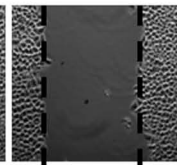

20h

MMP2/9 In

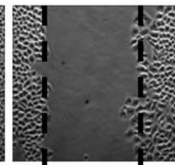

20h

MMP3 In

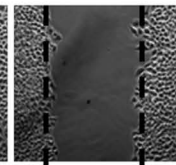

20h

UO126

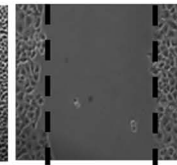

20h

**Fig. S4**
